# Supplementary material
Source: Springer Nature journal article supplement (https://www.springermedizin.de/resource/supplementary/12871_2004_30_MOESM2_ESM.pdf/9429496)
Supplement: MOESM2 [file 9429496]

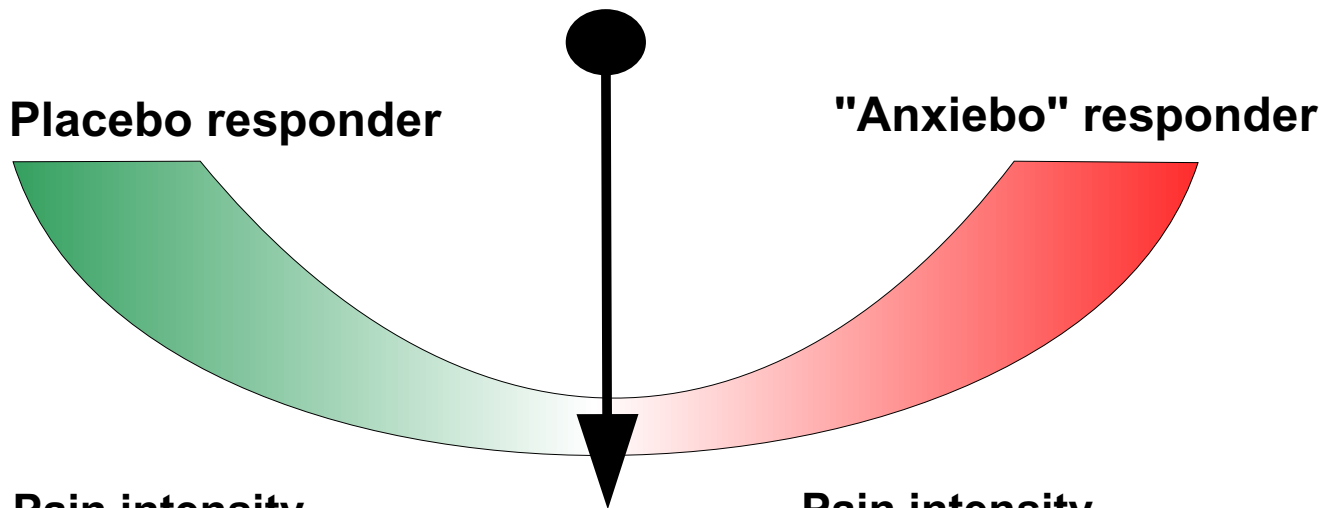

**Placebo responder**

**"Anxiebo" responder**

**Pain intensity**

- Decreased
- Good sensitivity to opioid analgesics

**Pain intensity**

- Increased or unchanged over prolonged period
- Poor sensitivity to opioid analgesics

**PCA-injections also unrelated to pain**
